# Supplementary material for: A Computational and Experimental Study of the Regulatory Mechanisms of the Complement System
Source: PubMed Central journal article supplement (PMC3024260; doi:10.1371/journal.pcbi.1001059), 2011-01-20
Supplement: pcbi.1001059.s004.pdf [file pcbi.1001059.s004.pdf]

| Name                  | Initial Concentrations [nM] |
|-----------------------|-----------------------------|
| CRP                   | 0.2                         |
| PC                    | 0.0327796                   |
| PC/CRP                | 0                           |
| C4                    | 77                          |
| C4a                   | 0                           |
| C4b                   | 0                           |
| C2                    | 31                          |
| C1                    | 247                         |
| PC/CRP/C1             | 0                           |
| C2a                   | 0                           |
| C2b                   | 0                           |
| C4b/C2a               | 0                           |
| C3                    | 465                         |
| C3a                   | 0                           |
| C3b                   | 0                           |
| dC3b                  | 0                           |
| MASP                  | 0.68                        |
| dC4b/C2a              | 0                           |
| GlcNac                | 0                           |
| GlcNac/LF             | 0                           |
| LF                    | 2                           |
| GlcNac/LF/MASP        | 0                           |
| PC/CRP/LF             | 0                           |
| PC/CRP/LF/MASP        | 0                           |
| GlcNac/LF/CRP         | 0                           |
| GlcNac/LF/CRP/C1      | 0                           |
| C4BP                  | 26                          |
| C4BP/PC/CRP           | 0                           |
| C4BP/GlcNac/LF/CRP    | 0                           |
| iC4b/C2a              | 0                           |
| C4BP/C4b              | 0                           |
| C4b/C2a/C4BP          | 0                           |
| dC4b/C2a/C4BP         | 0                           |
| PC/CRP/LF/C1          | 0                           |
| C4BP/PC/CRP/LF        | 0                           |
| GlcNac/LF/CRP/MASP    | 0                           |
| PC/CRP/LF/C1/MASP     | 0                           |
| GlcNac/HF             | 0                           |
| HF                    | 0                           |
| GlcNac/HF/MASP        | 0                           |
| X                     | 0                           |
| GlcNac/LF/CRP/C1/MASP | 0                           |

Table S1: The initial concentrations.
