# Supplementary material for: A Computational and Experimental Study of the Regulatory Mechanisms of the Complement System
Source: PubMed Central journal article supplement (PMC3024260; doi:10.1371/journal.pcbi.1001059), 2011-01-20
Supplement: pcbi.1001059.s005.pdf [file pcbi.1001059.s005.pdf]

| Parameter                | Values      |
|--------------------------|-------------|
| <i>ka01<sub>1</sub></i>  | 0.027599856 |
| <i>ka01<sub>2</sub></i>  | 0.0109      |
| <i>ka02<sub>1</sub></i>  | $7.4E - 4$  |
| <i>ka02<sub>2</sub></i>  | 0.0011      |
| <i>ka03<sub>1</sub>*</i> | 2.0         |
| <i>ka04<sub>1</sub>*</i> | 10.5        |
| <i>kc01<sub>1</sub></i>  | 0.64564663  |
| <i>kc01<sub>2</sub></i>  | 0.19455111  |
| <i>kc02</i>              | $5.91E - 4$ |
| <i>kc03<sub>1</sub></i>  | 0.41400447  |
| <i>kc03<sub>2</sub></i>  | 0.9964757   |
| <i>kc04<sub>1</sub></i>  | 0.97783655  |
| <i>ka03<sub>2</sub></i>  | 500.0       |
| <i>ka04<sub>2</sub></i>  | 2500.0      |
| <i>kd02<sub>2</sub></i>  | 0.1         |
| <i>kd02<sub>1</sub></i>  | 0.0368011   |
| <i>kd03<sub>1</sub></i>  | 66.3777     |
| <i>kd03<sub>2</sub></i>  | 829.116     |
| <i>kb01<sub>1</sub></i>  | $1.45E - 4$ |
| <i>kb01<sub>2</sub></i>  | 0.07761722  |
| <i>kb02<sub>1</sub></i>  | $2.14E - 7$ |
| <i>kb02<sub>2</sub></i>  | 0.1         |
| <i>kb03<sub>1</sub></i>  | 93.97925    |
| <i>kb03<sub>2</sub></i>  | 8815.971    |
| <i>kb04<sub>1</sub>*</i> | 1.1         |
| <i>kb04<sub>2</sub>*</i> | 2000.0      |
| <i>kc04<sub>2</sub></i>  | 0.19916244  |
| <i>kd01<sub>1</sub></i>  | $7.07E - 5$ |
| <i>kd01<sub>2</sub></i>  | $7.23E - 5$ |
| <i>kd04<sub>1</sub>*</i> | 1.1         |
| <i>kd04<sub>2</sub>*</i> | 2000.0      |
| <i>ke01<sub>1</sub></i>  | $7.07E - 5$ |
| <i>ke01<sub>2</sub></i>  | $1.0E - 4$  |
| <i>ke02<sub>1</sub></i>  | $7.4E - 4$  |
| <i>ke02<sub>2</sub></i>  | 0.0011      |
| <i>ke03<sub>1</sub></i>  | 2.0         |
| <i>ke03<sub>2</sub></i>  | 500.0       |
| <i>ke04<sub>1</sub></i>  | 10.5        |
| <i>ke04<sub>2</sub></i>  | 2500.0      |
| <i>kf01<sub>1</sub></i>  | 0.9699983   |
| <i>kf01<sub>2</sub></i>  | 0.06902058  |
| <i>kf02<sub>1</sub></i>  | 0.25880134  |
| <i>kf02<sub>2</sub></i>  | 0.4837216   |
| <i>kf03</i>              | 0.06135372  |
| <i>kf04<sub>2</sub></i>  | 0.9836912   |
| <i>kf04<sub>1</sub></i>  | 0.6134161   |

| Parameter                 | Values                |
|---------------------------|-----------------------|
| <i>kf05</i>               | 0.98077756            |
| <i>kf06<sub>1</sub></i>   | 0.613416              |
| <i>kf06<sub>2</sub></i>   | 0.983691              |
| <i>kf07<sub>1</sub></i>   | 0.613416              |
| <i>kf07<sub>2</sub></i>   | 0.983691              |
| <i>kd05<sub>1</sub></i>   | $7.4 \times 10^{-4}$  |
| <i>kd05<sub>2</sub></i>   | 0.0011                |
| <i>kd06<sub>1</sub>*</i>  | 2.0                   |
| <i>kd06<sub>2</sub>*</i>  | 500.0                 |
| <i>kd07<sub>1</sub>*</i>  | 10.5                  |
| <i>kd07<sub>2</sub>*</i>  | 2500.0                |
| <i>ke05<sub>1</sub></i>   | $2.14 \times 10^{-7}$ |
| <i>ke05<sub>2</sub></i>   | 0.1                   |
| <i>ke06<sub>1</sub></i>   | 93.97925              |
| <i>ke06<sub>2</sub></i>   | 8815.971              |
| <i>ke07<sub>1</sub>*</i>  | 1.1                   |
| <i>ke07<sub>2</sub>*</i>  | 2000.0                |
| <i>kd08<sub>1</sub></i>   | 0.0368011             |
| <i>kd08<sub>2</sub></i>   | 0.1                   |
| <i>kd09<sub>1</sub></i>   | $7.4 \times 10^{-4}$  |
| <i>kd09<sub>2</sub></i>   | 0.0011                |
| <i>kd10<sub>1</sub></i>   | 71.17058              |
| <i>kd10<sub>2</sub></i>   | 3796.2268             |
| <i>kd11<sub>1</sub></i>   | 38.96259              |
| <i>kd11<sub>2</sub></i>   | 5972.3066             |
| <i>kg01<sub>1</sub></i>   | $1.45 \times 10^{-4}$ |
| <i>kg01<sub>2</sub></i>   | 0.07761722            |
| <i>kg02<sub>1</sub></i>   | $2.14 \times 10^{-7}$ |
| <i>kg02<sub>2</sub></i>   | 0.1                   |
| <i>kg03<sub>1</sub></i>   | 93.97925              |
| <i>kg03<sub>2</sub></i>   | 8815.971              |
| <i>kg04<sub>1</sub>*</i>  | 1.1                   |
| <i>kg04<sub>2</sub>*</i>  | 2000.0                |
| <i>ke08<sub>1</sub></i>   | $2.14 \times 10^{-7}$ |
| <i>ke08<sub>2</sub></i>   | 0.1                   |
| <i>ke09<sub>1</sub></i>   | $7.4 \times 10^{-4}$  |
| <i>ke09<sub>2</sub></i>   | 0.0011                |
| <i>ke10<sub>1</sub></i>   | 83.52653              |
| <i>ke10<sub>2</sub></i>   | 0.010678623           |
| <i>ke11<sub>1</sub></i>   | 79.544876             |
| <i>ke11<sub>2</sub></i>   | 42.56355              |
| <i>ktmp1</i>              | $3.42 \times 10^{-4}$ |
| <i>ktmp2</i>              | 0.492901              |
| <i>ktmp3</i>              | 0.0470911             |
| <i>ktmpf1<sub>1</sub></i> | 0.0                   |
| <i>ktmpf1<sub>2</sub></i> | 0.0                   |

Table S2: Parameter values. Known parameters are marked with \*.
