# Supplementary material for: A Computational and Experimental Study of the Regulatory Mechanisms of the Complement System
Source: PubMed Central journal article supplement (PMC3024260; doi:10.1371/journal.pcbi.1001059), 2011-01-20
Supplement: pcbi.1001059.s006.pdf [file pcbi.1001059.s006.pdf]

| Name                        | Variable    | Parents                                   |
|-----------------------------|-------------|-------------------------------------------|
| CRP                         | <i>px1</i>  | <i>px1, px2, px3, k1, k2,</i>             |
| PC                          | <i>px2</i>  | <i>px1, px2, px3, k1, k2,</i>             |
| PC/CRP                      | <i>px3</i>  | <i>px3, pt9, pt10, pt11, pt12,</i>        |
| C4                          | <i>px4</i>  | <i>px4, pt1, pt2, pt3, pt4,</i>           |
| C4a                         | <i>px5</i>  | <i>px4, px5,</i>                          |
| C4b                         | <i>px6</i>  | <i>px6, pt1, pt3, pt4, pt34, pa1,</i>     |
| C2                          | <i>px7</i>  | <i>px7, pt5, pt6, pt7, pt8,</i>           |
| C1                          | <i>px8</i>  | <i>px8, px19, pt15, pt16, k66,</i>        |
| PC/CRP/C1                   | <i>px9</i>  | <i>px3, px8, px9, k3, k4,</i>             |
| C2a                         | <i>px10</i> | <i>px10, pt5, pt13, pt14, pa2,</i>        |
| C2b                         | <i>px11</i> | <i>px7, px11,</i>                         |
| C4b/C2a                     | <i>px12</i> | <i>px12, pt17, pt18, pt19, pt20,</i>      |
| C3                          | <i>px13</i> | <i>px12, px13, k9,</i>                    |
| C3a                         | <i>px14</i> | <i>px13, px14,</i>                        |
| C3b                         | <i>px15</i> | <i>px12, px13, px15, k9, k89,</i>         |
| MASP                        | <i>px16</i> | <i>px16, px18, px24, pt30, k16, k64,</i>  |
| LF                          | <i>px17</i> | <i>px3, px17, px18, k28, k29,</i>         |
| PC/CRP/LF                   | <i>px18</i> | <i>px18, pt21, pt22, pt23, pt24,</i>      |
| PC/CRP/LF/MASP              | <i>px19</i> | <i>px8, px19, pt31, k15, k66,</i>         |
| C4BP                        | <i>px20</i> | <i>px20, pt25, pt26, pt27, pt28, k88,</i> |
| C4BP/PC/CRP                 | <i>px21</i> | <i>px3, px20, px21, k40, k41,</i>         |
| C4BP/C4b                    | <i>px22</i> | <i>px6, px20, px22, k45, k46,</i>         |
| C4b/C2a/C4BP                | <i>px23</i> | <i>px12, px20, px23, k48, k49,</i>        |
| PC/CRP/LF/C1                | <i>px24</i> | <i>px16, px24, pt32, k53, k64,</i>        |
| C4BP/PC/CRP/LF              | <i>px25</i> | <i>px18, px20, px25, k91, k92,</i>        |
| PC/CRP/LF/C1/MASP           | <i>px26</i> | <i>px26, pt33, k65, k67,</i>              |
| <i>TmpVar<sub>t1</sub></i>  | <i>pt1</i>  | <i>px4, px9, k5, k13,</i>                 |
| <i>TmpVar<sub>t2</sub></i>  | <i>pt2</i>  | <i>px4, px19, k17, k18,</i>               |
| <i>TmpVar<sub>t3</sub></i>  | <i>pt3</i>  | <i>px4, px24, k54, k55,</i>               |
| <i>TmpVar<sub>t4</sub></i>  | <i>pt4</i>  | <i>px4, px26, k68, k69,</i>               |
| <i>TmpVar<sub>t5</sub></i>  | <i>pt5</i>  | <i>px7, px9, k6, k14,</i>                 |
| <i>TmpVar<sub>t6</sub></i>  | <i>pt6</i>  | <i>px7, px19, k30, k31,</i>               |
| <i>TmpVar<sub>t7</sub></i>  | <i>pt7</i>  | <i>px7, px24, k56, k57,</i>               |
| <i>TmpVar<sub>t8</sub></i>  | <i>pt8</i>  | <i>px7, px26, k70, k71,</i>               |
| <i>TmpVar<sub>t9</sub></i>  | <i>pt9</i>  | <i>px1, px2, px9, k1, k4,</i>             |
| <i>TmpVar<sub>t10</sub></i> | <i>pt10</i> | <i>px18, px21, k29, k41,</i>              |
| <i>TmpVar<sub>t11</sub></i> | <i>pt11</i> | <i>px3, px8, k2, k3,</i>                  |
| <i>TmpVar<sub>t12</sub></i> | <i>pt12</i> | <i>px3, px17, px20, k28, k40,</i>         |
| <i>TmpVar<sub>t13</sub></i> | <i>pt13</i> | <i>px12, px20, k8, k47,</i>               |
| <i>TmpVar<sub>t14</sub></i> | <i>pt14</i> | <i>px6, px10, k7,</i>                     |
| <i>TmpVar<sub>t15</sub></i> | <i>pt15</i> | <i>px3, px8, px18, k3, k52,</i>           |
| <i>TmpVar<sub>t16</sub></i> | <i>pt16</i> | <i>px9, px24, px26, k4, k53, k67,</i>     |
| <i>TmpVar<sub>t17</sub></i> | <i>pt17</i> | <i>px2, px6, px10, k7, k49,</i>           |
| <i>TmpVar<sub>t18</sub></i> | <i>pt18</i> | <i>px12, px20, k47,</i>                   |
| <i>TmpVar<sub>t19</sub></i> | <i>pt19</i> | <i>px12, px20, k8, k44,</i>               |
| <i>TmpVar<sub>t20</sub></i> | <i>pt20</i> | <i>px12, px20, k48, k90,</i>              |
| <i>TmpVar<sub>t21</sub></i> | <i>pt21</i> | <i>px16, px18, k16, k29,</i>              |
| <i>TmpVar<sub>t22</sub></i> | <i>pt22</i> | <i>px3, px17, px19, k15, k28,</i>         |
| <i>TmpVar<sub>t23</sub></i> | <i>pt23</i> | <i>px8, px18, px20, k52, k91,</i>         |
| <i>TmpVar<sub>t24</sub></i> | <i>pt24</i> | <i>px24, px25, k53, k92,</i>              |
| <i>TmpVar<sub>t25</sub></i> | <i>pt25</i> | <i>px3, px6, px20, k40, k46,</i>          |
| <i>TmpVar<sub>t26</sub></i> | <i>pt26</i> | <i>px21, px22, k41, k45,</i>              |
| <i>TmpVar<sub>t27</sub></i> | <i>pt27</i> | <i>px12, px18, px20, k48, k91,</i>        |
| <i>TmpVar<sub>t28</sub></i> | <i>pt28</i> | <i>px23, px25, k49, k92,</i>              |
| <i>TmpVar<sub>t29</sub></i> | <i>pt29</i> | <i>px12, px22, k8, k45,</i>               |
| <i>TmpVar<sub>t30</sub></i> | <i>pt30</i> | <i>px19, px26, k15, k65,</i>              |
| <i>TmpVar<sub>t31</sub></i> | <i>pt31</i> | <i>px16, px18, px26, k16, k67,</i>        |
| <i>TmpVar<sub>t32</sub></i> | <i>pt32</i> | <i>px8, px18, px26, k52, k65,</i>         |
| <i>TmpVar<sub>t33</sub></i> | <i>pt33</i> | <i>px8, px16, px19, px24, k64, k66,</i>   |
| <i>TmpVar<sub>t34</sub></i> | <i>pt34</i> | <i>px6, px10, px20, k7, k46,</i>          |
| <i>TmpVar<sub>a1</sub></i>  | <i>pa1</i>  | <i>pt2, pt18, pt29,</i>                   |
| <i>TmpVar<sub>a2</sub></i>  | <i>pa2</i>  | <i>pt6, pt7, pt8,</i>                     |

Table S3: DBN Structure of PC-initiated classical complement pathway
