# Supplementary material for: A Computational and Experimental Study of the Regulatory Mechanisms of the Complement System
Source: PubMed Central journal article supplement (PMC3024260; doi:10.1371/journal.pcbi.1001059), 2011-01-20
Supplement: pcbi.1001059.s007.pdf [file pcbi.1001059.s007.pdf]

| Name                        | Variable    | Parents                                 |
|-----------------------------|-------------|-----------------------------------------|
| CRP                         | <i>gx1</i>  | <i>gx1, gx15, gx18, k32, k33,</i>       |
| C4                          | <i>gx2</i>  | <i>gx2, gt1, gt2, gt3, gt4,</i>         |
| C4a                         | <i>gx3</i>  | <i>gx2, gx3,</i>                        |
| C4b                         | <i>gx4</i>  | <i>gx4, gt3, gt4, gt9, gt10, ga1,</i>   |
| C2                          | <i>gx5</i>  | <i>gx5, gt5, gt6, gt7, gt8,</i>         |
| C1                          | <i>gx6</i>  | <i>gx6, gt11, gt12,</i>                 |
| C2a                         | <i>gx7</i>  | <i>gx4, gx7, gt8, gt13, ga2, k7,</i>    |
| C2b                         | <i>gx8</i>  | <i>gx8, gt5, gt6, gt7, gt8,</i>         |
| C4b/C2a                     | <i>gx9</i>  | <i>gx9, gt14, gt15, gt16, k8,</i>       |
| C3                          | <i>gx10</i> | <i>gx9, gx10, k9,</i>                   |
| C3a                         | <i>gx11</i> | <i>gx9, gx10, gx11, k9,</i>             |
| C3b                         | <i>gx12</i> | <i>gx9, gx10, gx12, k9, k89,</i>        |
| MASP                        | <i>gx13</i> | <i>gx13, gx15, gt17, gt18, k21,</i>     |
| GlcNAc                      | <i>gx14</i> | <i>gx14, gx15, gx16, k19, k20,</i>      |
| GlcNAc/LF                   | <i>gx15</i> | <i>gx15, gt19, gt20, gt21, k20,</i>     |
| LF                          | <i>gx16</i> | <i>gx14, gx15, gx16, k19, k20,</i>      |
| GlcNAc/LF/MASP              | <i>gx17</i> | <i>gx13, gx15, gx17, k21, k22,</i>      |
| GlcNAc/LF/CRP               | <i>gx18</i> | <i>gx18, gt22, gt23, gt24, gt25,</i>    |
| GlcNAc/LF/CRP/C1            | <i>gx19</i> | <i>gx13, gx19, gt26, k1, k35,</i>       |
| C4BP                        | <i>gx20</i> | <i>gx9, gx20, gt27, gt28, k48, k88,</i> |
| C4BP/GlcNAc/LF/CRP          | <i>gx21</i> | <i>gx18, gx20, gx21, k42, k43,</i>      |
| C4BP/C4b                    | <i>gx22</i> | <i>gx4, gx20, gx22, k45, k46,</i>       |
| C4b/C2a/C4BP                | <i>gx23</i> | <i>gx9, gx20, gx23, k48, k49,</i>       |
| GlcNAc/LF/CRP/MASP          | <i>gx24</i> | <i>gx6, gx24, gt29, k59, k66,</i>       |
| GlcNAc/LF/CRP/C1/MASP       | <i>gx25</i> | <i>gx25, gt30, k2, k67,</i>             |
| <i>TmpVar<sub>t1</sub></i>  | <i>gt1</i>  | <i>gx2, gx17, k23, k24,</i>             |
| <i>TmpVar<sub>t2</sub></i>  | <i>gt2</i>  | <i>gx2, gx19, k36, k37,</i>             |
| <i>TmpVar<sub>t3</sub></i>  | <i>gt3</i>  | <i>gx2, gx24, k60, k61,</i>             |
| <i>TmpVar<sub>t4</sub></i>  | <i>gt4</i>  | <i>gx2, gx25, k84, k85,</i>             |
| <i>TmpVar<sub>t5</sub></i>  | <i>gt5</i>  | <i>gx5, gx17, k25, k26,</i>             |
| <i>TmpVar<sub>t6</sub></i>  | <i>gt6</i>  | <i>gx5, gx19, k38, k39,</i>             |
| <i>TmpVar<sub>t7</sub></i>  | <i>gt7</i>  | <i>gx5, gx24, k62, k63,</i>             |
| <i>TmpVar<sub>t8</sub></i>  | <i>gt8</i>  | <i>gx5, gx25, k86, k87,</i>             |
| <i>TmpVar<sub>t9</sub></i>  | <i>gt9</i>  | <i>gx9, gx22, k8, k45,</i>              |
| <i>TmpVar<sub>t10</sub></i> | <i>gt10</i> | <i>gx4, gx7, gx20, k7, k46,</i>         |
| <i>TmpVar<sub>t11</sub></i> | <i>gt11</i> | <i>gx19, gx25, k35, k67,</i>            |
| <i>TmpVar<sub>t12</sub></i> | <i>gt12</i> | <i>gx6, gx18, gx24, k34, k66,</i>       |
| <i>TmpVar<sub>t13</sub></i> | <i>gt13</i> | <i>gx9, gx20, k8, k47,</i>              |
| <i>TmpVar<sub>t14</sub></i> | <i>gt14</i> | <i>gx4, gx7, gx23, k7, k49,</i>         |
| <i>TmpVar<sub>t15</sub></i> | <i>gt15</i> | <i>gx9, gx20, k44, k47,</i>             |
| <i>TmpVar<sub>t16</sub></i> | <i>gt16</i> | <i>gx9, gx20, k48, k90,</i>             |
| <i>TmpVar<sub>t17</sub></i> | <i>gt17</i> | <i>gx17, gx24, gx25, k2, k22, k59,</i>  |
| <i>TmpVar<sub>t18</sub></i> | <i>gt18</i> | <i>gx13, gx18, gx19, k1, k58,</i>       |
| <i>TmpVar<sub>t19</sub></i> | <i>gt19</i> | <i>gx14, gx16, k19,</i>                 |
| <i>TmpVar<sub>t20</sub></i> | <i>gt20</i> | <i>gx17, gx18, k22, k33,</i>            |
| <i>TmpVar<sub>t21</sub></i> | <i>gt21</i> | <i>gx1, gx13, gx15, k21, k32,</i>       |
| <i>TmpVar<sub>t22</sub></i> | <i>gt22</i> | <i>gx1, gx15, gx19, k32, k35,</i>       |
| <i>TmpVar<sub>t23</sub></i> | <i>gt23</i> | <i>gx21, gx24, k43, k59,</i>            |
| <i>TmpVar<sub>t24</sub></i> | <i>gt24</i> | <i>gx13, gx18, gx20, k42, k58,</i>      |
| <i>TmpVar<sub>t25</sub></i> | <i>gt25</i> | <i>gx6, gx18, k33, k34,</i>             |
| <i>TmpVar<sub>t26</sub></i> | <i>gt26</i> | <i>gx6, gx18, gx25, k2, k34,</i>        |
| <i>TmpVar<sub>t27</sub></i> | <i>gt27</i> | <i>gx21, gx22, gx23, k43, k45, k49,</i> |
| <i>TmpVar<sub>t28</sub></i> | <i>gt28</i> | <i>gx4, gx18, gx20, k42, k46,</i>       |
| <i>TmpVar<sub>t29</sub></i> | <i>gt29</i> | <i>gx13, gx18, gx25, k58, k67,</i>      |
| <i>TmpVar<sub>t30</sub></i> | <i>gt30</i> | <i>gx6, gx13, gx19, gx24, k1, k66,</i>  |
| <i>TmpVar<sub>a1</sub></i>  | <i>ga1</i>  | <i>gx9, gx20, gt1, gt2, k47,</i>        |
| <i>TmpVar<sub>a2</sub></i>  | <i>ga2</i>  | <i>gt5, gt6, gt7,</i>                   |

Table S4: DBN Structure of GlcNAc-initiated classical complement pathway
