# Supplementary material for: A Computational and Experimental Study of the Regulatory Mechanisms of the Complement System
Source: PubMed Central journal article supplement (PMC3024260; doi:10.1371/journal.pcbi.1001059), 2011-01-20
Supplement: pcbi.1001059.s008.pdf [file pcbi.1001059.s008.pdf]

| Probability distribution                      |
|-----------------------------------------------|
| $px1 \sim U(0.16808383, 0.21)$                |
| $px2 \sim U(0.028013973, 0.035)$              |
| $px3 \sim U(0.0, 5.988024 \times 10^{-6})$    |
| $px4 \sim U(64.03194, 80.0)$                  |
| $px5 \sim U(0.0, 0.15968063)$                 |
| $px6 \sim U(0.0, 0.15968063)$                 |
| $px7 \sim U(28.013971, 35.0)$                 |
| $px8 \sim U(200.09981, 250.0)$                |
| $px9 \sim U(0.0, 6.986028 \times 10^{-5})$    |
| $px10 \sim U(0.0, 0.005988024)$               |
| $px11 \sim U(0.0, 0.06986028)$                |
| $px12 \sim U(0.0, 0.001996008)$               |
| $px13 \sim U(400.19962, 500.0)$               |
| $px14 \sim U(0.0, 0.998004)$                  |
| $px15 \sim U(0.0, 0.01996008)$                |
| $px16 \sim U(0.5602794, 0.7)$                 |
| $px17 \sim U(1.6808383, 2.1)$                 |
| $px18 \sim U(0.0, 4.99002 \times 10^{-7})$    |
| $px19 \sim U(0.0, 6.986028 \times 10^{-6})$   |
| $px20 \sim U(24.011976, 30.0)$                |
| $px21 \sim U(0.0, 5.988024 \times 10^{-5})$   |
| $px22 \sim U(0.0, 0.023952097)$               |
| $px23 \sim U(0.0, 6.986028 \times 10^{-5})$   |
| $px24 \sim U(0.0, 6.986028 \times 10^{-5})$   |
| $px25 \sim U(0.0, 5.988024 \times 10^{-8})$   |
| $px26 \sim U(0.0, 5.988024 \times 10^{-5})$   |
| $gx1 \sim U(0.16808383, 0.21)$                |
| $gx2 \sim U(64.03194, 80.0)$                  |
| $gx3 \sim U(0.0, 0.15968063)$                 |
| $gx4 \sim U(0.0, 0.15968063)$                 |
| $gx5 \sim U(28.013971, 35.0)$                 |
| $gx6 \sim U(200.09981, 250.0)$                |
| $gx7 \sim U(0.0, 9.98004 \times 10^{-4})$     |
| $gx8 \sim U(0.0, 0.06986028)$                 |
| $gx9 \sim U(0.0, 1.9960079 \times 10^{-4})$   |
| $gx10 \sim U(400.19962, 500.0)$               |
| $gx11 \sim U(0.0, 0.15968063)$                |
| $gx12 \sim U(0.0, 9.9800396 \times 10^{-5})$  |
| $gx13 \sim U(0.5602794, 0.7)$                 |
| $gx14 \sim U(2.4011977, 3.0)$                 |
| $gx15 \sim U(0.0, 2.3952096 \times 10^{-5})$  |
| $gx16 \sim U(1.6808383, 2.1)$                 |
| $gx17 \sim U(0.0, 3.1936127 \times 10^{-11})$ |
| $gx18 \sim U(0.0, 1.996008 \times 10^{-8})$   |
| $gx19 \sim U(0.0, 1.996008 \times 10^{-6})$   |
| $gx20 \sim U(24.011976, 30.0)$                |
| $gx21 \sim U(0.0, 2.994012 \times 10^{-7})$   |
| $gx22 \sim U(0.0, 0.029940119)$               |
| $gx23 \sim U(0.0, 1.1976048 \times 10^{-4})$  |
| $gx24 \sim U(0.0, 9.98004 \times 10^{-8})$    |
| $gx25 \sim U(0.0, 2.994012 \times 10^{-6})$   |

Table S5: Prior (initial) probability distribution of variables
