# Supplementary material for: A Computational and Experimental Study of the Regulatory Mechanisms of the Complement System
Source: PubMed Central journal article supplement (PMC3024260; doi:10.1371/journal.pcbi.1001059), 2011-01-20
Supplement: pcbi.1001059.s009.pdf [file pcbi.1001059.s009.pdf]

| Parameter               | Probability distribution   |
|-------------------------|----------------------------|
| <i>ka01<sub>1</sub></i> | $k1 \sim U(0.0, 1.0)$      |
| <i>ka01<sub>2</sub></i> | $k2 \sim U(0.0, 1.0)$      |
| <i>ka02<sub>1</sub></i> | $k3 \sim U(0.0, 1.0)$      |
| <i>ka02<sub>2</sub></i> | $k4 \sim U(0.0, 1.0)$      |
| <i>ka03<sub>1</sub></i> | $k5 \sim U(0.0, 100.0)$    |
| <i>ka04<sub>1</sub></i> | $k6 \sim U(0.0, 100.0)$    |
| <i>kc01<sub>1</sub></i> | $k7 \sim U(0.0, 1.0)$      |
| <i>kc01<sub>2</sub></i> | $k8 \sim U(0.0, 1.0)$      |
| <i>kc02</i>             | $k9 \sim U(0.0, 1.0)$      |
| <i>kc03<sub>1</sub></i> | $k10 \sim U(0.0, 1.0)$     |
| <i>kc03<sub>2</sub></i> | $k11 \sim U(0.0, 1.0)$     |
| <i>kc04<sub>1</sub></i> | $k12 \sim U(0.0, 1.0)$     |
| <i>ka03<sub>2</sub></i> | $k13 \sim U(0.0, 10000.0)$ |
| <i>ka04<sub>2</sub></i> | $k14 \sim U(0.0, 10000.0)$ |
| <i>kd02<sub>2</sub></i> | $k15 \sim U(0.0, 1.0)$     |
| <i>kd02<sub>1</sub></i> | $k16 \sim U(0.0, 1.0)$     |
| <i>kd03<sub>1</sub></i> | $k17 \sim U(0.0, 100.0)$   |
| <i>kd03<sub>2</sub></i> | $k18 \sim U(0.0, 10000.0)$ |
| <i>kb01<sub>1</sub></i> | $k19 \sim U(0.0, 1.0)$     |
| <i>kb01<sub>2</sub></i> | $k20 \sim U(0.0, 1.0)$     |
| <i>kb02<sub>1</sub></i> | $k21 \sim U(0.0, 1.0)$     |
| <i>kb02<sub>2</sub></i> | $k22 \sim U(0.0, 1.0)$     |
| <i>kb03<sub>1</sub></i> | $k23 \sim U(0.0, 100.0)$   |
| <i>kb03<sub>2</sub></i> | $k24 \sim U(0.0, 10000.0)$ |
| <i>kb04<sub>1</sub></i> | $k25 \sim U(0.0, 100.0)$   |
| <i>kb04<sub>2</sub></i> | $k26 \sim U(0.0, 10000.0)$ |
| <i>kc04<sub>2</sub></i> | $k27 \sim U(0.0, 1.0)$     |
| <i>kd01<sub>1</sub></i> | $k28 \sim U(0.0, 0.0707)$  |
| <i>kd01<sub>2</sub></i> | $k29 \sim U(0.0, 1.0)$     |
| <i>kd04<sub>1</sub></i> | $k30 \sim U(0.0, 100.0)$   |
| <i>kd04<sub>2</sub></i> | $k31 \sim U(0.0, 10000.0)$ |
| <i>ke01<sub>1</sub></i> | $k32 \sim U(0.0, 1.0)$     |
| <i>ke01<sub>2</sub></i> | $k33 \sim U(0.0, 1.0)$     |
| <i>ke02<sub>1</sub></i> | $k34 \sim U(0.0, 1.0)$     |
| <i>ke02<sub>2</sub></i> | $k35 \sim U(0.0, 1.0)$     |
| <i>ke03<sub>1</sub></i> | $k36 \sim U(0.0, 100.0)$   |
| <i>ke03<sub>2</sub></i> | $k37 \sim U(0.0, 10000.0)$ |
| <i>ke04<sub>1</sub></i> | $k38 \sim U(0.0, 100.0)$   |
| <i>ke04<sub>2</sub></i> | $k39 \sim U(0.0, 10000.0)$ |
| <i>kf01<sub>1</sub></i> | $k40 \sim U(0.0, 1.0)$     |
| <i>kf01<sub>2</sub></i> | $k41 \sim U(0.0, 1.0)$     |
| <i>kf02<sub>1</sub></i> | $k42 \sim U(0.0, 1.0)$     |
| <i>kf02<sub>2</sub></i> | $k43 \sim U(0.0, 1.0)$     |
| <i>kf03</i>             | $k44 \sim U(0.0, 1.0)$     |
| <i>kf04<sub>2</sub></i> | $k45 \sim U(0.0, 1.0)$     |
| <i>kf04<sub>1</sub></i> | $k46 \sim U(0.0, 1.0)$     |

| Parameter                 | Probability distribution   |
|---------------------------|----------------------------|
| <i>kf05</i>               | $k47 \sim U(0.0, 1.0)$     |
| <i>kf06<sub>1</sub></i>   | $k48 \sim U(0.0, 1.0)$     |
| <i>kf06<sub>2</sub></i>   | $k49 \sim U(0.0, 1.0)$     |
| <i>kf07<sub>1</sub></i>   | $k50 \sim U(0.0, 1.0)$     |
| <i>kf07<sub>2</sub></i>   | $k51 \sim U(0.0, 1.0)$     |
| <i>kd05<sub>1</sub></i>   | $k52 \sim U(0.0, 1.0)$     |
| <i>kd05<sub>2</sub></i>   | $k53 \sim U(0.0, 1.0)$     |
| <i>kd06<sub>1</sub></i>   | $k54 \sim U(0.0, 100.0)$   |
| <i>kd06<sub>2</sub></i>   | $k55 \sim U(0.0, 10000.0)$ |
| <i>kd07<sub>1</sub></i>   | $k56 \sim U(0.0, 100.0)$   |
| <i>kd07<sub>2</sub></i>   | $k57 \sim U(0.0, 10000.0)$ |
| <i>ke05<sub>1</sub></i>   | $k58 \sim U(0.0, 1.0)$     |
| <i>ke05<sub>2</sub></i>   | $k59 \sim U(0.0, 1.0)$     |
| <i>ke06<sub>1</sub></i>   | $k60 \sim U(0.0, 100.0)$   |
| <i>ke06<sub>2</sub></i>   | $k61 \sim U(0.0, 10000.0)$ |
| <i>ke07<sub>1</sub></i>   | $k62 \sim U(0.0, 100.0)$   |
| <i>ke07<sub>2</sub></i>   | $k63 \sim U(0.0, 10000.0)$ |
| <i>kd08<sub>1</sub></i>   | $k64 \sim U(0.0, 1.0)$     |
| <i>kd08<sub>2</sub></i>   | $k65 \sim U(0.0, 1.0)$     |
| <i>kd09<sub>1</sub></i>   | $k66 \sim U(0.0, 1.0)$     |
| <i>kd09<sub>2</sub></i>   | $k67 \sim U(0.0, 1.0)$     |
| <i>kd10<sub>1</sub></i>   | $k68 \sim U(0.0, 100.0)$   |
| <i>kd10<sub>2</sub></i>   | $k69 \sim U(0.0, 10000.0)$ |
| <i>kd11<sub>1</sub></i>   | $k70 \sim U(0.0, 100.0)$   |
| <i>kd11<sub>2</sub></i>   | $k71 \sim U(0.0, 10000.0)$ |
| <i>kg01<sub>1</sub></i>   | $k72 \sim U(0.0, 1.0)$     |
| <i>kg01<sub>2</sub></i>   | $k73 \sim U(0.0, 1.0)$     |
| <i>kg02<sub>1</sub></i>   | $k74 \sim U(0.0, 1.0)$     |
| <i>kg02<sub>2</sub></i>   | $k75 \sim U(0.0, 1.0)$     |
| <i>kg03<sub>1</sub></i>   | $k76 \sim U(0.0, 100.0)$   |
| <i>kg03<sub>2</sub></i>   | $k77 \sim U(0.0, 10000.0)$ |
| <i>kg04<sub>1</sub></i>   | $k78 \sim U(0.0, 100.0)$   |
| <i>kg04<sub>2</sub></i>   | $k79 \sim U(0.0, 10000.0)$ |
| <i>ke08<sub>1</sub></i>   | $k80 \sim U(0.0, 1.0)$     |
| <i>ke08<sub>2</sub></i>   | $k81 \sim U(0.0, 1.0)$     |
| <i>ke09<sub>1</sub></i>   | $k82 \sim U(0.0, 1.0)$     |
| <i>ke09<sub>2</sub></i>   | $k83 \sim U(0.0, 1.0)$     |
| <i>ke10<sub>1</sub></i>   | $k84 \sim U(0.0, 100.0)$   |
| <i>ke10<sub>2</sub></i>   | $k85 \sim U(0.0, 1.0)$     |
| <i>ke11<sub>1</sub></i>   | $k86 \sim U(0.0, 100.0)$   |
| <i>ke11<sub>2</sub></i>   | $k87 \sim U(0.0, 100.0)$   |
| <i>ktmp1</i>              | $k88 \sim U(0.0, 1.0)$     |
| <i>ktmp2</i>              | $k89 \sim U(0.0, 1.0)$     |
| <i>ktmp3</i>              | $k90 \sim U(0.0, 1.0)$     |
| <i>ktmpf1<sub>1</sub></i> | $k91 \sim U(0.0, 1.0)$     |
| <i>ktmpf1<sub>2</sub></i> | $k92 \sim U(0.0, 1.0)$     |

Table S6: Prior (initial) probability distribution of parameters
