# Supplementary material for: A Computational and Experimental Study of the Regulatory Mechanisms of the Complement System
Source: PubMed Central journal article supplement (PMC3024260; doi:10.1371/journal.pcbi.1001059), 2011-01-20
Supplement: pcbi.1001059.s010.pdf [file pcbi.1001059.s010.pdf]

## Text S1. The ODE Model

$$\begin{aligned}
\frac{d([CRP])}{dt} &= - ((ka01_1 \cdot [PC] \cdot [CRP] - ka01_2 \cdot [PC/CRP])) \\
&\quad - ((ke01_1 \cdot [GlcNac/LF] \cdot [CRP] - ke01_2 \cdot [GlcNac/LF/CRP])) \\
\frac{d([PC])}{dt} &= - ((ka01_1 \cdot [PC] \cdot [CRP] - ka01_2 \cdot [PC/CRP])) \\
\frac{d([PC/CRP])}{dt} &= + ((ka01_1 \cdot [PC] \cdot [CRP] - ka01_2 \cdot [PC/CRP])) \\
&\quad - ((ka02_1 \cdot [PC/CRP] \cdot [C1] - ka02_2 \cdot [PC/CRP/C1])) \\
&\quad - ((kf01_1 \cdot [C4BP] \cdot [PC/CRP] - kf01_2 \cdot [C4BP/PC/CRP])) \\
&\quad - ((kd01_1 \cdot [PC/CRP] \cdot [LF] - kd01_2 \cdot [PC/CRP/LF])) \\
\frac{d([C4])}{dt} &= - \left( \frac{kd03_1 \cdot [PC/CRP/LF/MASP] \cdot [C4]}{kd03_2 + [C4]} \right) \\
&\quad - \left( \frac{kb03_1 \cdot [GlcNac/LF/MASP] \cdot [C4]}{kb03_2 + [C4]} \right) \\
&\quad - \left( \frac{ke03_1 \cdot [GlcNac/LF/CRP/C1] \cdot [C4]}{ke03_2 + [C4]} \right) \\
&\quad - \left( \frac{ka03_1 \cdot [PC/CRP/C1] \cdot [C4]}{ka03_2 + [C4]} \right) \\
&\quad - \left( \frac{kd06_1 \cdot [PC/CRP/LF/C1] \cdot [C4]}{kd06_2 + [C4]} \right) \\
&\quad - \left( \frac{ke06_1 \cdot [GlcNac/LF/CRP/MASP] \cdot [C4]}{ke06_2 + [C4]} \right) \\
&\quad - \left( \frac{kd10_1 \cdot [PC/CRP/LF/C1/MASP] \cdot [C4]}{kd10_2 + [C4]} \right) \\
&\quad - \left( \frac{kg03_1 \cdot [GlcNac/HF/MASP] \cdot [C4]}{kg03_2 + [C4]} \right) \\
\frac{d([C4a])}{dt} &= + \left( \frac{kd03_1 \cdot [PC/CRP/LF/MASP] \cdot [C4]}{kd03_2 + [C4]} \right) \\
&\quad + \left( \frac{kb03_1 \cdot [GlcNac/LF/MASP] \cdot [C4]}{kb03_2 + [C4]} \right) \\
&\quad + \left( \frac{ke03_1 \cdot [GlcNac/LF/CRP/C1] \cdot [C4]}{ke03_2 + [C4]} \right) \\
&\quad + \left( \frac{ka03_1 \cdot [PC/CRP/C1] \cdot [C4]}{ka03_2 + [C4]} \right) \\
&\quad + \left( \frac{kd06_1 \cdot [PC/CRP/LF/C1] \cdot [C4]}{kd06_2 + [C4]} \right) \\
&\quad + \left( \frac{ke06_1 \cdot [GlcNac/LF/CRP/MASP] \cdot [C4]}{ke06_2 + [C4]} \right) \\
&\quad + \left( \frac{kd10_1 \cdot [PC/CRP/LF/C1/MASP] \cdot [C4]}{kd10_2 + [C4]} \right) \\
&\quad + \left( \frac{kg03_1 \cdot [GlcNac/HF/MASP] \cdot [C4]}{kg03_2 + [C4]} \right) \\
\frac{d([C4b])}{dt} &= + \left( \frac{kd03_1 \cdot [PC/CRP/LF/MASP] \cdot [C4]}{kd03_2 + [C4]} \right) \\
&\quad + \left( \frac{kb03_1 \cdot [GlcNac/LF/MASP] \cdot [C4]}{kb03_2 + [C4]} \right) \\
&\quad + \left( \frac{ke03_1 \cdot [GlcNac/LF/CRP/C1] \cdot [C4]}{ke03_2 + [C4]} \right) \\
&\quad + \left( \frac{ka03_1 \cdot [PC/CRP/C1] \cdot [C4]}{ka03_2 + [C4]} \right) \\
&\quad - ((kf04_1 \cdot [C4BP] \cdot [C4b] - kf04_2 \cdot [C4BP/C4b])) \\
&\quad + (kf05 \cdot [C4b/C2a] \cdot [C4BP]) \\
&\quad + \left( \frac{kd06_1 \cdot [PC/CRP/LF/C1] \cdot [C4]}{kd06_2 + [C4]} \right) \\
&\quad + \left( \frac{ke06_1 \cdot [GlcNac/LF/CRP/MASP] \cdot [C4]}{ke06_2 + [C4]} \right) \\
&\quad + \left( \frac{kd10_1 \cdot [PC/CRP/LF/C1/MASP] \cdot [C4]}{kd10_2 + [C4]} \right) \\
&\quad - ((kc01_1 \cdot [C4b] \cdot [C2a] - kc01_2 \cdot [C4b/C2a])) \\
&\quad + \left( \frac{kg03_1 \cdot [GlcNac/HF/MASP] \cdot [C4]}{kg03_2 + [C4]} \right)
\end{aligned}$$

$$\begin{aligned}
\frac{d([C2])}{dt} &= - \left( \frac{kd04_1 \cdot [PC/CRP/LF/MASP] \cdot [C2]}{kd04_2 + [C2]} \right) \\
&- \left( \frac{kb04_1 \cdot [GlcNac/LF/MASP] \cdot [C2]}{kb04_2 + [C2]} \right) \\
&- \left( \frac{ke04_1 \cdot [GlcNac/LF/CRP/C1] \cdot [C2]}{ke04_2 + [C2]} \right) \\
&- \left( \frac{ka04_1 \cdot [PC/CRP/C1] \cdot [C2]}{ka04_2 + [C2]} \right) \\
&- \left( \frac{kd07_1 \cdot [PC/CRP/LF/C1] \cdot [C2]}{kd07_2 + [C2]} \right) \\
&- \left( \frac{ke07_1 \cdot [GlcNac/LF/CRP/MASP] \cdot [C2]}{ke07_2 + [C2]} \right) \\
&- \left( \frac{kd11_1 \cdot [PC/CRP/LF/C1/MASP] \cdot [C2]}{kd11_2 + [C2]} \right) \\
&- \left( \frac{kg04_1 \cdot [GlcNac/HF/MASP] \cdot [C2]}{kg04_2 + [C2]} \right) \\
\frac{d([C1])}{dt} &= - ((ka02_1 \cdot [PC/CRP] \cdot [C1] - ka02_2 \cdot [PC/CRP/C1])) \\
&- ((ke02_1 \cdot [GlcNac/LF/CRP] \cdot [C1] - ke02_2 \cdot [GlcNac/LF/CRP/C1])) \\
&- ((kd05_1 \cdot [PC/CRP/LF] \cdot [C1] - kd05_2 \cdot [PC/CRP/LF/C1])) \\
&- ((kd09_1 \cdot [PC/CRP/LF/MASP] \cdot [C1] - kd09_2 \cdot [PC/CRP/LF/C1/MASP])) \\
\frac{d([PC/CRP/C1])}{dt} &= + ((ka02_1 \cdot [PC/CRP] \cdot [C1] - ka02_2 \cdot [PC/CRP/C1])) \\
\frac{d([C2a])}{dt} &= + \left( \frac{kd04_1 \cdot [PC/CRP/LF/MASP] \cdot [C2]}{kd04_2 + [C2]} \right) \\
&+ \left( \frac{kb04_1 \cdot [GlcNac/LF/MASP] \cdot [C2]}{kb04_2 + [C2]} \right) \\
&+ \left( \frac{ke04_1 \cdot [GlcNac/LF/CRP/C1] \cdot [C2]}{ke04_2 + [C2]} \right) \\
&+ (kf05 \cdot [C4b/C2a] \cdot [C4BP]) \\
&+ \left( \frac{ka04_1 \cdot [PC/CRP/C1] \cdot [C2]}{ka04_2 + [C2]} \right) \\
&+ \left( \frac{kd07_1 \cdot [PC/CRP/LF/C1] \cdot [C2]}{kd07_2 + [C2]} \right) \\
&+ \left( \frac{ke07_1 \cdot [GlcNac/LF/CRP/MASP] \cdot [C2]}{ke07_2 + [C2]} \right) \\
&- ((kc01_1 \cdot [C4b] \cdot [C2a] - kc01_2 \cdot [C4b/C2a])) \\
&+ \left( \frac{kd11_1 \cdot [PC/CRP/LF/C1/MASP] \cdot [C2]}{kd11_2 + [C2]} \right) \\
&+ \left( \frac{kg04_1 \cdot [GlcNac/HF/MASP] \cdot [C2]}{kg04_2 + [C2]} \right) \\
\frac{d([C2b])}{dt} &= + \left( \frac{kd04_1 \cdot [PC/CRP/LF/MASP] \cdot [C2]}{kd04_2 + [C2]} \right) \\
&+ \left( \frac{kb04_1 \cdot [GlcNac/LF/MASP] \cdot [C2]}{kb04_2 + [C2]} \right) \\
&+ \left( \frac{ke04_1 \cdot [GlcNac/LF/CRP/C1] \cdot [C2]}{ke04_2 + [C2]} \right) \\
&+ \left( \frac{ka04_1 \cdot [PC/CRP/C1] \cdot [C2]}{ka04_2 + [C2]} \right) \\
&+ \left( \frac{kd07_1 \cdot [PC/CRP/LF/C1] \cdot [C2]}{kd07_2 + [C2]} \right) \\
&+ \left( \frac{ke07_1 \cdot [GlcNac/LF/CRP/MASP] \cdot [C2]}{ke07_2 + [C2]} \right) \\
&+ \left( \frac{kd11_1 \cdot [PC/CRP/LF/C1/MASP] \cdot [C2]}{kd11_2 + [C2]} \right) \\
&+ \left( \frac{kg04_1 \cdot [GlcNac/HF/MASP] \cdot [C2]}{kg04_2 + [C2]} \right)
\end{aligned}$$

$$\begin{aligned}
\frac{d([C4b/C2a])}{dt} &= - (kf03 \cdot [C4b/C2a] \cdot [C4BP]) \\
&\quad - (kf05 \cdot [C4b/C2a] \cdot [C4BP]) \\
&\quad - ((kf06_1 \cdot [C4b/C2a] \cdot [C4BP] - kf06_2 \cdot [C4b/C2a/C4BP])) \\
&\quad - (k1_{(tmp3)} \cdot [C4b/C2a]) \\
&\quad + ((kc01_1 \cdot [C4b] \cdot [C2a] - kc01_2 \cdot [C4b/C2a])) \\
&\quad - ((kc04_1 \cdot [C4b/C2a] - kc04_2 \cdot [dC4b/C2a])) \\
\frac{d([C3])}{dt} &= - (kc02 \cdot [C4b/C2a] \cdot [C3]) \\
\frac{d([C3a])}{dt} &= + (kc02 \cdot [C4b/C2a] \cdot [C3]) \\
\frac{d([C3b])}{dt} &= - (k1_{(tmp2)} \cdot [C3b]) \\
&\quad + (kc02 \cdot [C4b/C2a] \cdot [C3]) \\
&\quad - ((kc03_1 \cdot [C3b] - kc03_2 \cdot [dC3b])) \\
\frac{d([dC3b])}{dt} &= + ((kc03_1 \cdot [C3b] - kc03_2 \cdot [dC3b])) \\
\frac{d([MASP])}{dt} &= - ((kb02_1 \cdot [GlcNac/LF] \cdot [MASP] - kb02_2 \cdot [GlcNac/LF/MASP])) \\
&\quad - ((ke05_1 \cdot [GlcNac/LF/CRP] \cdot [MASP] - ke05_2 \cdot [GlcNac/LF/CRP/MASP])) \\
&\quad - ((kd08_1 \cdot [PC/CRP/LF/C1] \cdot [MASP] - kd08_2 \cdot [PC/CRP/LF/C1/MASP])) \\
&\quad - ((kg02_1 \cdot [GlcNac/HF] \cdot [MASP] - kg02_2 \cdot [GlcNac/HF/MASP])) \\
&\quad - ((kd02_1 \cdot [PC/CRP/LF] \cdot [MASP] - kd02_2 \cdot [PC/CRP/LF/MASP])) \\
\frac{d([dC4b/C2a])}{dt} &= - ((kf07_1 \cdot [dC4b/C2a] \cdot [C4BP] - kf07_2 \cdot [dC4b/C2a/C4BP])) \\
&\quad + ((kc04_1 \cdot [C4b/C2a] - kc04_2 \cdot [dC4b/C2a])) \\
\frac{d([GlcNac])}{dt} &= - ((kb01_1 \cdot [GlcNac] \cdot [LF] - kb01_2 \cdot [GlcNac/LF])) \\
\frac{d([GlcNac/LF])}{dt} &= + ((kb01_1 \cdot [GlcNac] \cdot [LF] - kb01_2 \cdot [GlcNac/LF])) \\
&\quad - ((kb02_1 \cdot [GlcNac/LF] \cdot [MASP] - kb02_2 \cdot [GlcNac/LF/MASP])) \\
&\quad - ((ke01_1 \cdot [GlcNac/LF] \cdot [CRP] - ke01_2 \cdot [GlcNac/LF/CRP])) \\
\frac{d([LF])}{dt} &= - ((kb01_1 \cdot [GlcNac] \cdot [LF] - kb01_2 \cdot [GlcNac/LF])) \\
&\quad - ((kd01_1 \cdot [PC/CRP] \cdot [LF] - kd01_2 \cdot [PC/CRP/LF])) \\
\frac{d([GlcNac/LF/MASP])}{dt} &= + ((kb02_1 \cdot [GlcNac/LF] \cdot [MASP] - kb02_2 \cdot [GlcNac/LF/MASP])) \\
\frac{d([PC/CRP/LF])}{dt} &= - ((kd05_1 \cdot [PC/CRP/LF] \cdot [C1] - kd05_2 \cdot [PC/CRP/LF/C1])) \\
&\quad - \left( (k1_{(tmpf1)} \cdot [C4BP] \cdot [PC/CRP/LF] - k2_{(tmpf1)} \cdot [C4BP/PC/CRP/LF]) \right) \\
&\quad + ((kd01_1 \cdot [PC/CRP] \cdot [LF] - kd01_2 \cdot [PC/CRP/LF])) \\
&\quad - ((kd02_1 \cdot [PC/CRP/LF] \cdot [MASP] - kd02_2 \cdot [PC/CRP/LF/MASP])) \\
\frac{d([PC/CRP/LF/MASP])}{dt} &= - ((kd09_1 \cdot [PC/CRP/LF/MASP] \cdot [C1] - kd09_2 \cdot [PC/CRP/LF/C1/MASP])) \\
&\quad + ((kd02_1 \cdot [PC/CRP/LF] \cdot [MASP] - kd02_2 \cdot [PC/CRP/LF/MASP])) \\
\frac{d([GlcNac/LF/CRP])}{dt} &= + ((ke01_1 \cdot [GlcNac/LF] \cdot [CRP] - ke01_2 \cdot [GlcNac/LF/CRP])) \\
&\quad - ((ke02_1 \cdot [GlcNac/LF/CRP] \cdot [C1] - ke02_2 \cdot [GlcNac/LF/CRP/C1])) \\
&\quad - ((kf02_1 \cdot [C4BP] \cdot [GlcNac/LF/CRP] - kf02_2 \cdot [C4BP/GlcNac/LF/CRP])) \\
&\quad - ((ke05_1 \cdot [GlcNac/LF/CRP] \cdot [MASP] - ke05_2 \cdot [GlcNac/LF/CRP/MASP])) \\
\frac{d([GlcNac/LF/CRP/C1])}{dt} &= + ((ke02_1 \cdot [GlcNac/LF/CRP] \cdot [C1] - ke02_2 \cdot [GlcNac/LF/CRP/C1])) \\
\frac{d([C4BP])}{dt} &= - ((kf01_1 \cdot [C4BP] \cdot [PC/CRP] - kf01_2 \cdot [C4BP/PC/CRP])) \\
&\quad - ((kf02_1 \cdot [C4BP] \cdot [GlcNac/LF/CRP] - kf02_2 \cdot [C4BP/GlcNac/LF/CRP])) \\
&\quad - ((kf04_1 \cdot [C4BP] \cdot [C4b] - kf04_2 \cdot [C4BP/C4b])) \\
&\quad - ((kf06_1 \cdot [C4b/C2a] \cdot [C4BP] - kf06_2 \cdot [C4b/C2a/C4BP])) \\
&\quad - ((kf07_1 \cdot [dC4b/C2a] \cdot [C4BP] - kf07_2 \cdot [dC4b/C2a/C4BP])) \\
&\quad - (k1_{(tmp1)} \cdot [C4BP]) \\
&\quad - \left( (k1_{(tmpf1)} \cdot [C4BP] \cdot [PC/CRP/LF] - k2_{(tmpf1)} \cdot [C4BP/PC/CRP/LF]) \right)
\end{aligned}$$

$$\begin{aligned}
\frac{d([C4BP/PC/CRP])}{dt} &= + ((kf01_1 \cdot [C4BP] \cdot [PC/CRP] - kf01_2 \cdot [C4BP/PC/CRP])) \\
\frac{d([C4BP/GlcNac/LF/CRP])}{dt} &= + ((kf02_1 \cdot [C4BP] \cdot [GlcNac/LF/CRP] - kf02_2 \cdot [C4BP/GlcNac/LF/CRP])) \\
\frac{d([iC4b/C2a])}{dt} &= + (kf03 \cdot [C4b/C2a] \cdot [C4BP]) \\
\frac{d([C4BP/C4b])}{dt} &= + ((kf04_1 \cdot [C4BP] \cdot [C4b] - kf04_2 \cdot [C4BP/C4b])) \\
\frac{d([C4b/C2a/C4BP])}{dt} &= + ((kf06_1 \cdot [C4b/C2a] \cdot [C4BP] - kf06_2 \cdot [C4b/C2a/C4BP])) \\
\frac{d([dC4b/C2a/C4BP])}{dt} &= + ((kf07_1 \cdot [dC4b/C2a] \cdot [C4BP] - kf07_2 \cdot [dC4b/C2a/C4BP])) \\
\frac{d([PC/CRP/LF/C1])}{dt} &= + ((kd05_1 \cdot [PC/CRP/LF] \cdot [C1] - kd05_2 \cdot [PC/CRP/LF/C1]) \\
&\quad - ((kd08_1 \cdot [PC/CRP/LF/C1] \cdot [MASP] - kd08_2 \cdot [PC/CRP/LF/C1/MASP])) \\
\frac{d([C4BP/PC/CRP/LF])}{dt} &= + \left( (k1_{(tmpf1)} \cdot [C4BP] \cdot [PC/CRP/LF] - k2_{(tmpf1)} \cdot [C4BP/PC/CRP/LF]) \right) \\
\frac{d([GlcNac/LF/CRP/MASP])}{dt} &= + ((ke05_1 \cdot [GlcNac/LF/CRP] \cdot [MASP] - ke05_2 \cdot [GlcNac/LF/CRP/MASP])) \\
\frac{d([PC/CRP/LF/C1/MASP])}{dt} &= + ((kd08_1 \cdot [PC/CRP/LF/C1] \cdot [MASP] - kd08_2 \cdot [PC/CRP/LF/C1/MASP])) \\
&\quad + ((kd09_1 \cdot [PC/CRP/LF/MASP] \cdot [C1] - kd09_2 \cdot [PC/CRP/LF/C1/MASP])) \\
\frac{d([GlcNac/HF])}{dt} &= + ((kg01_1 \cdot [X] \cdot [HF] - kg01_2 \cdot [GlcNac/HF]) \\
&\quad - ((kg02_1 \cdot [GlcNac/HF] \cdot [MASP] - kg02_2 \cdot [GlcNac/HF/MASP])) \\
\frac{d([HF])}{dt} &= - ((kg01_1 \cdot [X] \cdot [HF] - kg01_2 \cdot [GlcNac/HF])) \\
\frac{d([GlcNac/HF/MASP])}{dt} &= + ((kg02_1 \cdot [GlcNac/HF] \cdot [MASP] - kg02_2 \cdot [GlcNac/HF/MASP])) \\
\frac{d([X])}{dt} &= - ((kg01_1 \cdot [X] \cdot [HF] - kg01_2 \cdot [GlcNac/HF]))
\end{aligned}$$
